# Supplementary material for: A Dynamically Correlated Network Model for the Collective Dynamics in Glass-Forming Molecular Liquids and Polymers
Source: MDPI journal article supplement (doi:10.3390/polym13193424), 2021-10-06
Supplement: s1 [file s1]

## Supplementary Materials

### Dynamically correlated network model for the collective dynamics in glass-forming molecular liquids and polymers

Takashi Sasaki\*, Yuya Tsuzuki, Tatsuki Nakane

Department of Materials Science and Engineering, University of Fukui, Fukui 9108507  
Japan

\*sasakita@u-fukui.ac.jp

#### 1. The probability of dynamical coupling

The probabilities of the dynamical coupling with neighboring segments, which were calculated according to Equation (1) in the main text, are plotted against reduced temperature in Figure S1. Here, the coordination number  $z$  is 6, which is the case for a simple cubic lattice.

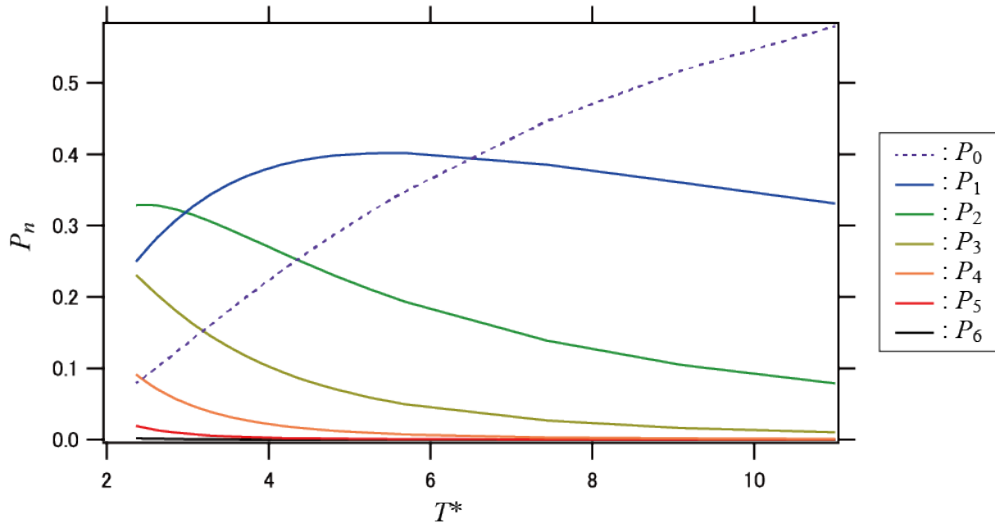

**Figure S1.** Probabilities of dynamical coupling with neighboring segments.

#### 2. Evaluation of fractal dimension

The fractal dimension  $d$  of the generated DCNs were estimated according to the power law  $N \sim R_g^d$ , where  $N$  is the number of segments in the DCN, and  $R_g$  is the radius of gyration of the DCN. Typical plots of  $\log N$  vs.  $\log R_g$  are shown in Figure S2. As for the surface area of the DCN, we also evaluated the exponent  $\theta$  according to the power law

$N_{\text{nc}} \sim \zeta^\theta \sim R_g^\theta$ . Here,  $N_{\text{nc}}$  is the number of uncorrelated segments that enclose the DCN. Typical plots of  $\log N_{\text{nc}}$  vs.  $\log R_g$  are shown in Figure S3.

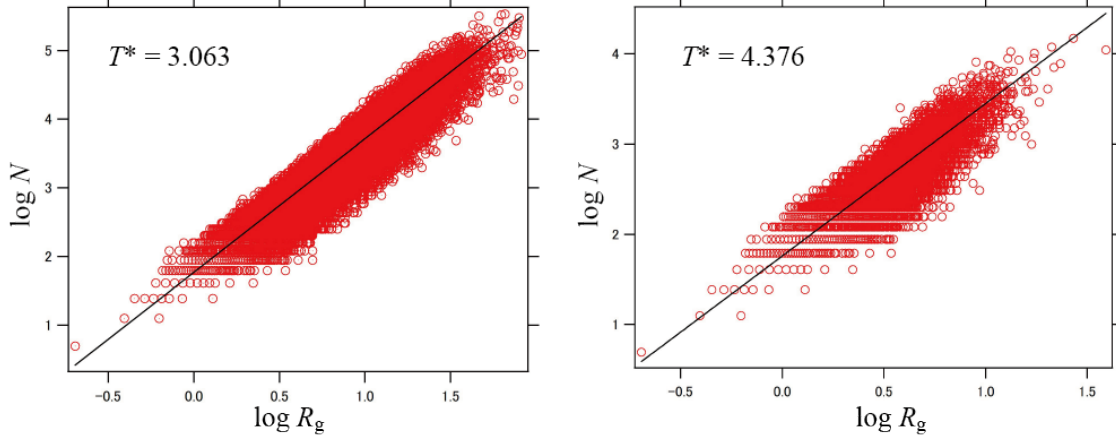

**Figure S2.** Plots of  $\log N$  vs.  $\log R_g$  at  $T^* = 3.063$  and  $4.376$ . Each plot includes data points of  $10^5$  DCNs. The solid lines indicate the results of linear regression analysis.

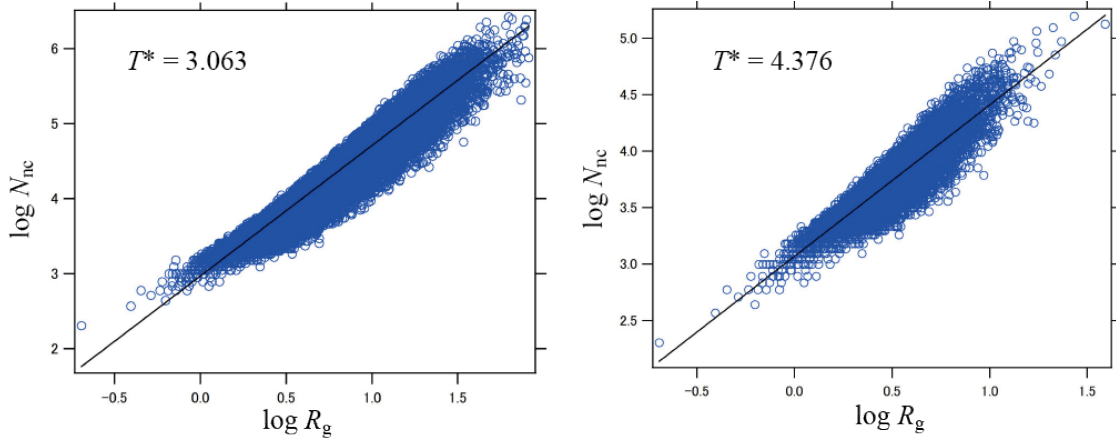

**Figure S3.** Plots of  $\log N_{\text{nc}}$  vs.  $\log R_g$  at  $T^* = 3.063$  and  $4.376$ . Each plot includes data points of  $10^5$  DCNs. The solid lines indicate the results of linear regression analysis.

### 3. Fitting analysis of the relaxation time

To compare the simulation results with the experimental data, we first obtained an empirical function for  $\log N_w$  ( $N_w$  is the weight average of the number of segments  $N$  in the DCN) as

$$\log N_w = c \{ b_1 \exp[-(T^* - T_0)/T_1] + b_2 \exp[-(T^* - T_0)/T_2] + (1 - b_1 - b_2) \exp[-(T^* - T_0)/T_3] \} \quad (\text{S1})$$

where  $b_1$ ,  $b_2$ ,  $T_0$ ,  $T_1$ ,  $T_2$ ,  $T_3$ , and  $c$  are fitting parameters to emulate the master curve of  $\log N_w$  vs.  $T^*$  profile. Note that equation (S1) shows  $\lim_{T^* \rightarrow \infty} N_w = 1$ , that is, no collective

motions occur at the high temperature limit. Non-linear least squares fitting analysis yielded the best-fit parameters as  $b_1 = 0.14292$ ,  $b_2 = 0.28894$ ,  $T_0 = 2.1828$ ,  $T_1 = 6.7363$ ,  $T_2 = 0.82917$ ,  $T_3 = 0.13495$ , and  $c = 6.6612$ . We also evaluated empirical functions for the temperature-dependent exponent  $\alpha$  for  $\alpha_2$ ,  $\alpha_3$ , and  $\alpha_4$  as

$$\alpha(T^*) = b_0 + b_1 \exp[-(T^* - T_0)/T_1] + b_2 \exp[-(T^* - T_0)/T_2] \quad (\text{S2})$$

where  $b_0$ ,  $b_1$ ,  $b_2$ ,  $T_1$ , and  $T_2$  are fitting parameters. The best-fit parameters obtained via non-linear least squares fitting analysis are listed in Table S1.  $T_0$  was fixed to 2.407. Note that  $\alpha_3$  exhibits a symmetrical shape with that of  $\alpha_4$ , as can be derived from the definition.

**Table S1.** Obtained fitting parameters in Equation (S2).

| $\alpha$   | $b_0$   | $b_1$    | $b_2$    | $T_1$  | $T_2$  |
|------------|---------|----------|----------|--------|--------|
| $\alpha_2$ | 0.73138 | 0.13721  | 0.12867  | 1.328  | 1.407  |
| $\alpha_3$ | 0.85333 | -0.19002 | -0.18787 | 6.1402 | 4.4413 |
| $\alpha_4$ | 0.14667 | 0.19002  | 0.18787  | 6.1402 | 4.4413 |

The results of the fitting analysis for the experimental data of relaxation time for ethylbenzene, salol, *o*-terphenyl, PDMS, PBD, and low  $M_w$  PMMA are shown in Figure S4. In general, fairly good agreements were obtained for these materials, although *o*-terphenyl exhibited small deviations at higher temperatures. Salol also showed small deviations in the entire range of temperature.

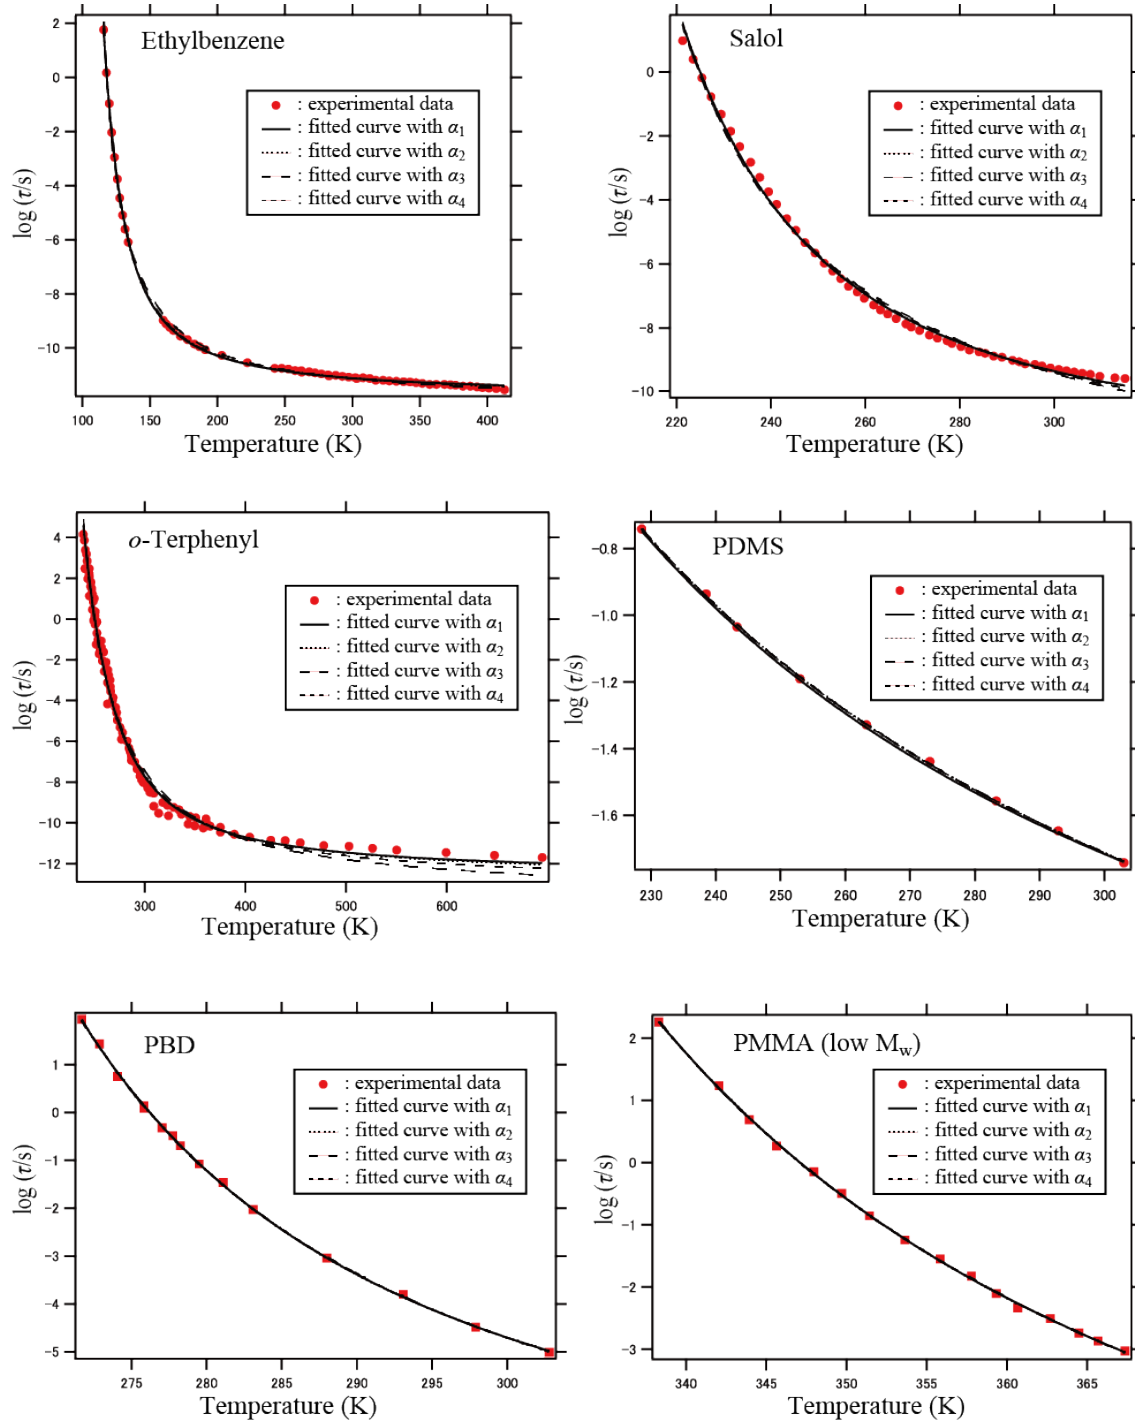

**Figure S4.** Relaxation time with respect to temperature for ethylbenzene, salol, *o*-terphenyl, PDMS, PBD, and low  $M_w$  PMMA. The solid curves are the results of least squares fitting analyses with Equation (7) in the main text for  $\alpha_1$ ,  $\alpha_2$ ,  $\alpha_3$ , and  $\alpha_4$ .
